# Supplementary material for: Hyperspectral ultraviolet to shortwave infrared characteristics of marine-harvested, washed ashore and virgin plastics
Source: Copernicus journal article supplement (doi:10.5194/essd-2019-134), 2019-08-19
Supplement: Supplementary file 1 [file Garaba_Dierssen_2019.xlsx]

## Sheet: ReadMe
Authors
Garaba SP (shungu.garaba@uni-oldenburg.de) and Dierssen HM (heidi.dierssen@uconn.edu)
Dataset Description
Particle sphericity and roundness were determined according to a qualitative scale (Powers, 1953).
A Marathon electronic digital calliper was used to measure the size distribution of dry marine-harvested microplastic particles
Figure Source
Powers, M. C.: A new roundness scale for sedimentary particles, J. Sediment. Res., 23, 117-119, doi:10.1306/d4269567-2b26-11d7-8648000102c1865d, 1953.

## Sheet: Table 2
Length (mm)	Width (mm)	Height (mm)	Color	Sphericity	Roundness
7.72	3.25	2.44	green	high	very angular
9.96	5.59	1.94	white	low	very angular
9.34	3.81	2.36	white	low	very angular
3.94	4.56	1.54	white	low	very angular
7.17	4.57	1.5	green	high	very angular
5.65	3.76	2.16	white	low	very angular
3.97	3.43	3.14	white	low	subangular
7.56	4.48	0.9	white	low	very angular
6.71	4.11	1.91	white	high	very angular
7.45	4.15	2.22	green	high	very angular
6.5	4.32	1.9	white	low	very angular
8.08	4.51	2.04	white	low	very angular
6.86	4.03	1.56	white	low	very angular
6.64	3.63	0.82	green	low	very angular
7.55	4.62	0.71	white	low	very angular
5.51	4.91	1.59	white	low	very angular
8.5	4.46	1.61	black	low	very angular
5.63	4.49	1.9	white	low	very angular
8.32	4.45	2	white	low	very angular
6.28	4.04	1.03	white	low	very angular
4.26	3.94	1.77	white	high	subangualr
5.55	4.94	1.4	white	high	very angular
5.04	3.79	0.9	white	high	very angular
5.89	4.43	0.91	white	high	very angular
6.47	4.57	1.75	white	low	very angular
13.07	3.82	0.42	white	low	very angular
4.5	4.29	1.35	white	low	sub angular
4.62	4.35	2.09	white	low	sub angular
6.57	4.69	1.37	white	low	very angular
17.21	4.58	0.36	white	low	very angular
7.77	5.32	0.6	white	low	very angular
5.19	4.28	1.26	white	high	very angular
3.85	2.71	2.62	white	high	very angular
6.14	4.41	0.85	white	high	very angular
10.54	3.66	0.35	white	low	very angular
5.59	4.25	1.62	white	high	very angular
8.29	4.66	1.01	white	low	very angular
10.16	4.15	0.89	white	low	very angular
15.08	4.38	0.25	white	low	very angular
7.33	4.34	0.68	white	high	very angular
6.3	4	0.61	white	high	very angular
8.52	5.77	0.42	white	high	very angular
7.17	5.64	1.23	white	high	very angular
4.93	4.28	1.09	white	high	subangular
6.35	5.34	0.77	white	low	very angular
6.68	3.67	0.62	white	low	very angular
7.64	4.46	0.65	white	high	very angular
